# Supplementary material for: Impact of smokeless tobacco packaging on perceptions and beliefs among youth, young adults, and adults in the U.S: findings from an internet-based cross-sectional survey
Source: PubMed Central journal article supplement (PMC3942180; doi:10.1186/1477-7517-11-2), 2014-01-17
Supplement: 1477-7517-11-2-S1.pdf [file 1477-7517-11-2-S1.pdf]

Supplemental Table 1: Multinomial logistic regression for perceptions of SLT packaging with graphic or text health warning labels

|                                                                                              |          | Deliver dangerous chemicals |             |          |              | Have the best taste   |              |          |             | Attract attention     |             |          |              |
|----------------------------------------------------------------------------------------------|----------|-----------------------------|-------------|----------|--------------|-----------------------|--------------|----------|-------------|-----------------------|-------------|----------|--------------|
|                                                                                              |          | Graphic                     |             | Text     |              | Graphic               |              | Text     |             | Graphic               |             | Text     |              |
|                                                                                              |          | OR                          | CI          | OR       | CI           | OR                    | CI           | OR       | CI          | OR                    | CI          | OR       | CI           |
| Age                                                                                          | 26-65    | Ref                         |             | Ref      |              | Ref                   |              | Ref      |             | Ref                   |             | Ref      |              |
|                                                                                              | 14-17    | 1.377                       | 0.937-2.024 | 1.651    | 0.626-4.352  | 0.690                 | 0.243-1.958  | 1.698*   | 1.110-2.599 | 1.356                 | 0.922-1.994 | 1.671*   | 1.009-2.768  |
|                                                                                              | 18-25    | 1.464*                      | 1.068-2.008 | 1.517    | 0.689-3.338  | 1.067                 | 0.534-2.130  | 1.819*** | 1.280-2.584 | 1.872***              | 1.344-2.606 | 2.112*** | 1.383-3.225  |
| Sex                                                                                          | Male     | Ref                         |             | Ref      |              | Ref                   |              | Ref      |             | Ref                   |             | Ref      |              |
|                                                                                              | Female   | 0.832                       | 0.634-1.093 | 1.314    | 0.676-2.558  | 1.042                 | 0.557-1.946  | 0.858    | 0.636-1.156 | 1.098                 | 0.828-1.455 | 0.801    | 0.557-1.150  |
| Tobacco                                                                                      | Non-user | Ref                         |             | Ref      |              | Ref                   |              | Ref      |             | Ref                   |             | Ref      |              |
|                                                                                              | User     | 1.650***                    | 1.231-2.211 | 2.086*   | 1.002-4.344  | 2.258*                | 1.127-4.525  | 1.677**  | 1.214-2.317 | 1.097                 | 0.811-1.484 | 1.614*   | 1.093-2.382  |
| Race                                                                                         | White    | Ref                         |             | Ref      |              | Ref                   |              | Ref      |             | Ref                   |             | Ref      |              |
|                                                                                              | Other    | 0.868                       | 0.519-1.452 | 4.850*** | 2.001-11.753 | 3.181**               | 1.325-7.636  | 0.905    | 0.522-1.569 | 0.776                 | 0.469-1.284 | 0.514+   | 0.251-1.051  |
|                                                                                              | Hispanic | 1.047                       | 0.670-1.637 | 3.818**  | 1.601-9.103  | 2.142+                | 0.847-5.248  | 0.980    | 0.605-1.587 | 0.652+                | 0.412-1.032 | 0.676    | 0.378-1.212  |
|                                                                                              | Black    | 0.687                       | 0.378-1.246 | 3.277*   | 1.140-9.416  | 3.169*                | 1.215-8.268  | 0.722    | 0.373-1.398 | 0.506*                | 0.287-0.892 | 0.685    | 0.343-1.370  |
|                                                                                              |          |                             |             |          |              |                       |              |          |             |                       |             |          |              |
|                                                                                              |          | Dangerous to health         |             |          |              | Appeal to peers       |              |          |             | Consider health risks |             |          |              |
|                                                                                              |          | Graphic                     |             | Text     |              | Graphic               |              | Text     |             | Graphic               |             | Text     |              |
|                                                                                              |          | OR                          | CI          | OR       | CI           | OR                    | CI           | OR       | CI          | OR                    | CI          | OR       | CI           |
| Age                                                                                          | 26-65    | Ref                         |             | Ref      |              | Ref                   |              | Ref      |             | Ref                   |             | Ref      |              |
|                                                                                              | 14-17    | 1.521*                      | 1.026-2.555 | 0.801    | 0.322-1.993  | 1.814                 | 0.829-3.969  | 1.860*** | 1.293-2.675 | 1.493*                | 1.026-2.171 | 0.463    | 0.147-1.455  |
|                                                                                              | 18-25    | 1.434*                      | 1.033-1.992 | 0.851    | 0.435-1.661  | 1.760+                | 0.945-3.277  | 2.669*** | 1.951-3.653 | 1.898***              | 1.371-2.629 | 1.833+   | 0.944-3.559  |
| Sex                                                                                          | Male     | Ref                         |             | Ref      |              | Ref                   |              | Ref      |             | Ref                   |             | Ref      |              |
|                                                                                              | Female   | 0.849                       | 0.641-1.125 | 1.155    | 0.636-2.099  | 2.089**               | 1.196-3.647  | 1.119    | 0.857-1.462 | 1.182                 | 0.897-1.558 | 1.646    | 0.899-3.012  |
| Tobacco                                                                                      | Non-user | Ref                         |             | Ref      |              | Ref                   |              | Ref      |             | Ref                   |             | Ref      |              |
|                                                                                              | User     | 1.569**                     | 1.159-2.123 | 2.074*   | 1.079-3.986  | 3.139***              | 1.694-5.817  | 1.338*   | 1.006-1.780 | 1.097                 | 0.817-1.473 | 1.625    | 0.848-3.115  |
| Race                                                                                         | White    | Ref                         |             | Ref      |              | Ref                   |              | Ref      |             | Ref                   |             | Ref      |              |
|                                                                                              | Other    | 1.085                       | 0.648-1.818 | 3.731**  | 1.616-8.614  | 2.106+                | 0.959-4.629  | 0.562*   | 0.341-0.926 | 0.508**               | 0.308-0.838 | 3.385**  | 1.439-7.960  |
|                                                                                              | Hispanic | 1.164                       | 0.737-1.839 | 3.471**  | 1.606-7.501  | 1.500                 | 0.716*-3.143 | 0.514**  | 0.329-0.802 | 0.571*                | 0.360-0.905 | 5.200*** | 2.451-11.032 |
|                                                                                              | Black    | 0.964                       | 0.542-1.714 | 1.964    | 0.649-5.947  | 1.203                 | 0.434-3.330  | 0.582*   | 0.341-0.991 | 0.470**               | 0.275-0.802 | 2.513+   | 0.914-6.910  |
|                                                                                              |          |                             |             |          |              |                       |              |          |             |                       |             |          |              |
|                                                                                              |          | Less attractive to smoker   |             |          |              | Want to be seen using |              |          |             | Reduce health risks   |             |          |              |
|                                                                                              |          | Graphic                     |             | Text     |              | Graphic               |              | Text     |             | Graphic               |             | Text     |              |
|                                                                                              |          | OR                          | CI          | OR       | CI           | OR                    | CI           | OR       | CI          | OR                    | CI          | OR       | CI           |
| Age                                                                                          | 26-65    | Ref                         |             | Ref      |              | Ref                   |              | Ref      |             | Ref                   |             | Ref      |              |
|                                                                                              | 14-17    | 1.738**                     | 1.191-2.537 | 0.980    | 0.406-2.365  | 1.241                 | 0.512-3.007  | 1.780**  | 1.242-2.552 | 0.932                 | 0.493-1.763 | 1.553*   | 1.023-2.358  |
|                                                                                              | 18-25    | 1.782***                    | 1.293-2.456 | 2.063*   | 1.124-3.784  | 1.201                 | 0.626-2.306  | 2.326*** | 1.707-3.169 | 1.097                 | 0.685-1.755 | 1.394+   | 0.979-1.986  |
| Sex                                                                                          | Male     | Ref                         |             | Ref      |              | Ref                   |              | Ref      |             | Ref                   |             | Ref      |              |
|                                                                                              | Female   | 1.219                       | 0.927-1.605 | 1.048    | 0.615-1.786  | 1.358                 | 0.762-2.421  | 1.448**  | 1.112-1.886 | 1.100                 | 0.726-1.668 | 0.955    | 0.706-1.291  |
| Tobacco                                                                                      | Non-user | Ref                         |             | Ref      |              | Ref                   |              | Ref      |             | Ref                   |             | Ref      |              |
|                                                                                              | User     | 1.212                       | 0.904-1.625 | 1.566    | 0.882-2.780  | 4.135***              | 2.097-8.152  | 1.379*   | 1.404-1.830 | 2.201***              | 1.393-3.478 | 1.542**  | 1.114-2.135  |
| Race                                                                                         | White    | Ref                         |             | Ref      |              | Ref                   |              | Ref      |             | Ref                   |             | Ref      |              |
|                                                                                              | Other    | 0.550*                      | 0.332-0.909 | 2.164*   | 1.012-4.626  | 2.904**               | 1.354-6.230  | 0.514**  | 0.311-0.850 | 2.461**               | 1.319-4.590 | 0.671    | 0.360-1.248  |
|                                                                                              | Hispanic | 0.634*                      | 0.405-0.993 | 1.782    | 0.839-3.782  | 0.683                 | 0.227-2.050  | 0.788    | 0.513-1.211 | 2.536***              | 1.432-4.492 | 0.936    | 0.560-1.562  |
|                                                                                              | Black    | 0.643                       | 0.371-1.114 | 2.127+   | 0.877-5.158  | 2.227+                | 0.889-5.576  | 0.641    | 0.374-1.098 | 2.185*                | 1.030-4.634 | 1.178    | 0.648-2.141  |
| <p>Note: "No Difference" is the referent; +p&lt;.10, *p&lt;.05, **p&lt;.01, ***p&lt;.001</p> |          |                             |             |          |              |                       |              |          |             |                       |             |          |              |
