# Supplementary material for: Impact of smokeless tobacco packaging on perceptions and beliefs among youth, young adults, and adults in the U.S: findings from an internet-based cross-sectional survey
Source: PubMed Central journal article supplement (PMC3942180; doi:10.1186/1477-7517-11-2), 2014-01-17
Supplement: 1477-7517-11-2-S3.pdf [file 1477-7517-11-2-S3.pdf]

Supplemental Table 3: Multinomial logistic regression for perceptions of SLT packaging with or without corporate branding

|         |          | Deliver dangerous chemicals |             |              |              | Have the best taste   |             |              |             | Attract your attention |             |              |             |
|---------|----------|-----------------------------|-------------|--------------|--------------|-----------------------|-------------|--------------|-------------|------------------------|-------------|--------------|-------------|
|         |          | Plain Pack                  |             | Branded Pack |              | Plain Pack            |             | Branded Pack |             | Plain Pack             |             | Branded Pack |             |
|         |          | OR                          | CI          | OR           | CI           | OR                    | CI          | OR           | CI          | OR                     | CI          | OR           | CI          |
| Age     | 26-65    | Ref                         |             | Ref          |              | Ref                   |             | Ref          |             | Ref                    |             | Ref          |             |
|         | 14-17    | 1.692*                      | 1.120-2.556 | 1.683        | 0.680-4.167  | 0.897                 | 0.273-2.950 | 1.960***     | 1.374-2.797 | 1.895                  | 0.870-4.130 | 1.646**      | 1.132-2.394 |
|         | 18-25    | 1.836***                    | 1.303-2.587 | 1.981+       | 0.979-4.008  | 2.274*                | 1.051-4.923 | 2.558***     | 1.887-3.468 | 2.524**                | 1.334-4.774 | 2.503***     | 1.800-3.482 |
| Sex     | Male     | Ref                         |             | Ref          |              | Ref                   |             | Ref          |             | Ref                    |             | Ref          |             |
|         | Female   | 0.814                       | 0.607-1.090 | 1.070        | 0.594-1.926  | 0.955                 | 0.480-1.897 | 1.192        | 0.919-1.547 | 0.966                  | 0.563-1.657 | 1.124        | 0.851-1.484 |
| Tobacco | Non-user | Ref                         |             | Ref          |              | Ref                   |             | Ref          |             | Ref                    |             | Ref          |             |
|         | User     | 1.421*                      | 1.038-1.946 | 2.247*       | 1.153-4.378  | 2.052+                | 0.958-4.393 | 1.281+       | 0.970-1.692 | 1.997*                 | 1.103-3.618 | 1.208        | 0.898-1.626 |
| Race    | White    | Ref                         |             | Ref          |              | Ref                   |             | Ref          |             | Ref                    |             | Ref          |             |
|         | Other    | 1.103                       | 0.650-1.871 | 2.920*       | 1.222-6.975  | 2.121                 | 0.718-6.266 | 0.892        | 0.550-1.446 | 1.338                  | 0.553-3.238 | 0.694        | 0.416-1.157 |
|         | Hispanic | 1.314                       | 0.822-2.099 | 3.765***     | 1.768-8.016  | 2.606*                | 1.050-6.470 | 0.710        | 0.460-1.095 | 1.923+                 | 0.932-3.966 | 0.676        | 0.427-1.072 |
|         | Black    | 1.468                       | 0.830-2.597 | 4.200**      | 1.681-10.494 | 4.312**               | 1.636-11.37 | 0.700        | 0.408-1.199 | 1.388                  | 0.527-3.660 | 0.668        | 0.386-1.156 |
|         |          |                             |             |              |              |                       |             |              |             |                        |             |              |             |
|         |          | Dangerous to health         |             |              |              | Appeal to peers       |             |              |             | Consider health risks  |             |              |             |
|         |          | Plain Pack                  |             | Branded Pack |              | Plain Pack            |             | Branded Pack |             | Plain Pack             |             | Branded Pack |             |
|         |          | OR                          | CI          | OR           | CI           | OR                    | CI          | OR           | CI          | OR                     | CI          | OR           | CI          |
| Age     | 26-65    | Ref                         |             | Ref          |              | Ref                   |             | Ref          |             | Ref                    |             | Ref          |             |
|         | 14-17    | 2.039**                     | 1.312-3.168 | 1.512        | 0.659-3.470  | 2.791*                | 1.039-7.498 | 1.691**      | 1.176-2.432 | 1.859**                | 1.243-2.782 | 1.199        | 0.537-2.677 |
|         | 18-25    | 2.126***                    | 1.459-3.098 | 2.533**      | 1.385-4.630  | 4.020***              | 1.712-9.441 | 3.234***     | 2.337-4.475 | 1.480*                 | 1.045-2.097 | 1.698+       | 0.966-2.987 |
| Sex     | Male     | Ref                         |             | Ref          |              | Ref                   |             | Ref          |             | Ref                    |             | Ref          |             |
|         | Female   | 0.827                       | 0.603-1.133 | 0.761        | 0.461-1.255  | 0.623                 | 0.311-1.250 | 1.164        | 0.887-1.527 | 0.869                  | 0.647-1.167 | 0.851        | 0.522-1.390 |
| Tobacco | Non-user | Ref                         |             | Ref          |              | Ref                   |             | Ref          |             | Ref                    |             | Ref          |             |
|         | User     | 1.292                       | 0.920-1.815 | 2.327**      | 1.316-4.115  | 1.586                 | 0.753-3.338 | 1.030        | 0.771-1.377 | 1.384*                 | 1.007-1.903 | 2.614***     | 1.495-4.571 |
| Race    | White    | Ref                         |             | Ref          |              | Ref                   |             | Ref          |             | Ref                    |             | Ref          |             |
|         | Other    | 1.006                       | 0.553-1.829 | 2.998**      | 1.489-6.037  | 1.651                 | 0.596-4.570 | 0.672        | 0.407-1.109 | 0.879                  | 0.492-1.571 | 3.186***     | 1.611-6.302 |
|         | Hispanic | 1.679*                      | 1.033-2.729 | 0.311***     | 1.592-6.073  | 1.956                 | 0.795-4.816 | 0.722        | 0.461-1.130 | 1.484+                 | 0.939-2.346 | 2.046+       | 0.985-4.250 |
|         | Black    | 2.424**                     | 1.383-4.249 | 3.016*       | 1.238-7.348  | 1.98                  | 0.614-6.388 | 0.936        | 0.537-1.630 | 1.356                  | 0.750-2.449 | 4.119***     | 1.923-8.825 |
|         |          |                             |             |              |              |                       |             |              |             |                        |             |              |             |
|         |          | Less attractive to smoker   |             |              |              | Want to be seen using |             |              |             | Reduce health risks    |             |              |             |
|         |          | Plain Pack                  |             | Branded Pack |              | Plain Pack            |             | Branded Pack |             | Plain Pack             |             | Branded Pack |             |
|         |          | OR                          | CI          | OR           | CI           | OR                    | CI          | OR           | CI          | OR                     | CI          | OR           | CI          |
| Age     | 26-65    | Ref                         |             | Ref          |              | Ref                   |             | Ref          |             | Ref                    |             | Ref          |             |
|         | 14-17    | 1.451*                      | 1.012-2.080 | 1.059        | 0.514-2.184  | 0.752                 | 0.198-2.860 | 2.124***     | 1.478-3.033 | 1.866                  | 0.799-4.354 | 1.320        | 0.815-2.137 |
|         | 18-25    | 1.848***                    | 1.356-2.517 | 1.876*       | 1.093-3.220  | 2.987*                | 1.278-6.985 | 3.565***     | 2.606-4.876 | 1.212                  | 0.592-2.481 | 1.425+       | 0.970-2.094 |
| Sex     | Male     | Ref                         |             | Ref          |              | Ref                   |             | Ref          |             | Ref                    |             | Ref          |             |
|         | Female   | 1.061                       | 0.814-1.382 | 0.690        | 0.429-1.110  | 1.297                 | 0.610-2.759 | 1.153        | 0.884-1.504 | 0.658                  | 0.359-1.207 | 1.021        | 0.732-1.423 |
| Tobacco | Non-user | Ref                         |             | Ref          |              | Ref                   |             | Ref          |             | Ref                    |             | Ref          |             |
|         | User     | 1.180                       | 0.889-1.567 | 1.636+       | 0.984-2.719  | 1.192                 | 0.537-2.644 | 1.403*       | 1.057-1.862 | 2.717**                | 1.372-5.382 | 1.667**      | 1.163-2.389 |
| Race    | White    | Ref                         |             | Ref          |              | Ref                   |             | Ref          |             | Ref                    |             | Ref          |             |
|         | Other    | 0.788                       | 0.476-1.303 | 2.405*       | 1.186-4.878  | 2.395                 | 0.791-7.249 | 0.729        | 0.445-1.194 | 3.779**                | 1.627-8.778 | 1.542        | 0.875-2.716 |
|         | Hispanic | 0.912                       | 0.581-1.429 | 2.480**      | 1.283-4.795  | 3.242*                | 1.265-8.314 | 0.659+       | 0.423-1.025 | 3.364**                | 1.556-7.270 | 1.371        | 0.814-2.310 |
|         | Black    | 0.873                       | 0.505-1.510 | 2.460*       | 1.102-5.491  | 2.199                 | 0.590-8.196 | 0.804        | 0.472-1.370 | 2.877*                 | 1.034-8.005 | 1.783+       | 0.971-3.274 |

Note: "No Difference" is the referent; +p<.10, \*p<.05, \*\*p<.01, \*\*\*p<.001
